# Supplementary material
Source: publisher figshare collection journal article supplement (https://springernature.figshare.com/ndownloader/files/20027573)
Supplement: Supplementary file [file 20027573]

| Common        | Postulated structures                                                                                                                                                                                                                                                                                                                                              |
|---------------|--------------------------------------------------------------------------------------------------------------------------------------------------------------------------------------------------------------------------------------------------------------------------------------------------------------------------------------------------------------------|
| All aliquots  | 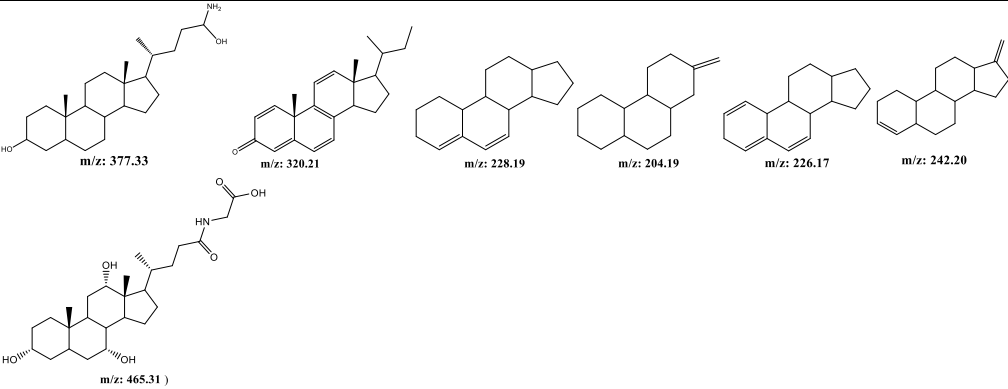 <p>m/z: 377.33    m/z: 320.21    m/z: 228.19    m/z: 204.19    m/z: 226.17    m/z: 242.20</p> <p>m/z: 465.31</p>                                                                                                                                                                |
| S24h and A72h |  <p>m/z: 622.26</p>                                                                                                                                                                                                                                                               |
| S24h and C24h |  <p>m/z: 439.25    m/z: 560.31    m/z: 578.30    m/z: 634.35</p> <p>m/z: 606.39    m/z: 628.30    m/z: 646.33    m/z: 696.37    m/z: 702.41</p> <p>m/z: 718.41    m/z: 770.42    m/z: 780.37    m/z: 786.42</p> <p>m/z: 833.45    m/z: 839.50    m/z: 849.45    m/z: 855.50</p> |

|                                |                                                                                                                                             |
|--------------------------------|---------------------------------------------------------------------------------------------------------------------------------------------|
| <p><b>C72h and S24h</b></p>    | <p>m/z: 258.23      m/z: 278.20      m/z: 296.25      m/z: 320.25      m/z: 531.23      m/z: 734.40</p> <p>m/z: 801.43</p>                  |
| <p><b>C24h and S72h</b></p>    | <p>m/z: 272.21      m/z: 419.34      m/z: 477.25      m/z: 356.27</p>                                                                       |
| <p><b>C72h and C24h</b></p>    | <p>m/z: 582.34</p>                                                                                                                          |
| <p><b>S72h and C72h</b></p>    | <p>m/z: 612.44      m/z: 626.42      m/z: 803.44</p>                                                                                        |
| <p><b>S24h, S72h, C24h</b></p> | <p>m/z: 230.20      m/z: 288.20      m/z: 298.27      m/z: 356.27      m/z: 425.26</p> <p>m/z: 485.26      m/z: 491.23      m/z: 555.28</p> |

|                                         |                                                                                                                                                                                                                                                                                                       |
|-----------------------------------------|-------------------------------------------------------------------------------------------------------------------------------------------------------------------------------------------------------------------------------------------------------------------------------------------------------|
| <b>S72h, S24h,<br/>C72h</b>             | 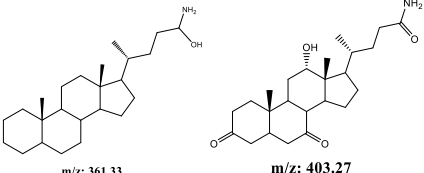 <p>m/z: 361.33      m/z: 403.27</p>                                                                                                                                                                                 |
| <b>S24h, C24h,<br/>C72h<br/>(cont.)</b> |  <p>m/z: 242.19      m/z: 310.27      m/z: 361.30      m/z: 429.29      m/z: 445.28</p> <p>m/z: 497.28      m/z: 509.18      m/z: 377.29</p> <p>m/z: 515.29      m/z: 566.34      m/z: 650.40      m/z: 666.39</p> |
| <b>C24h, C72h,<br/>S72h</b>             | <p>Not found.</p>                                                                                                                                                                                                                                                                                     |
